# Supplementary material for: Criteria and Indicators to Define Priority Areas for Biodiversity Conservation in Vietnam
Source: MDPI journal article supplement (doi:10.3390/f13091341), 2022-08-23
Supplement: s1 [file s1]

Archive with 1 entries (1 files):
- forests-1835234-supplementary.pdf
