# Supplementary material for: Criteria and Indicators to Define Priority Areas for Biodiversity Conservation in Vietnam
Source: MDPI journal article supplement (doi:10.3390/f13091341), 2022-08-23
Supplement: s1 [file s1 › forests-1835234-supplementary.pdf]

## *Appendix S1: Questionnaire*

## IDENTIFYING CRITERIA TO DEFINING PRIORITY AREAS FOR BIODIVERSITY CONSERVATION

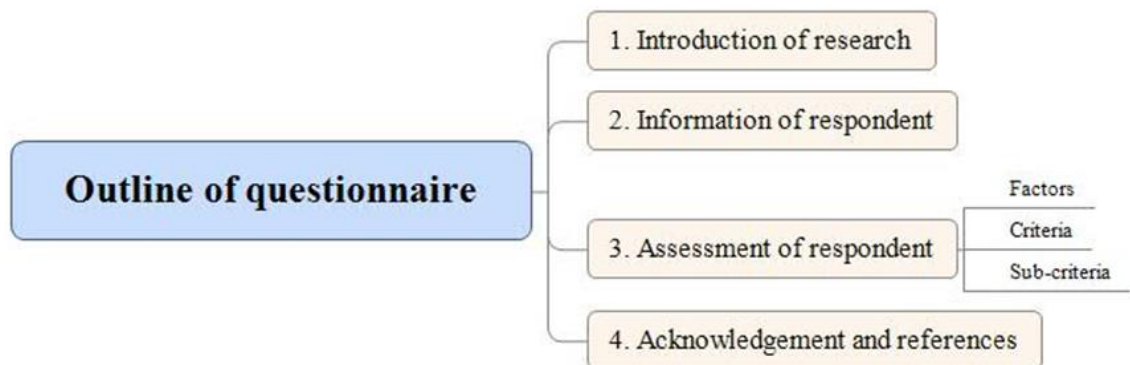

---

**Vu Xuan Dinh**

-----  
Ph.D. Student

Institute for Photogrammetry and Remote Sensing

Faculty of Environmental Sciences

TU Dresden, 01062 Dresden, Germany

Mobile phone: +49 17695837608  
-----

Lecturer and researcher Mapping and GIS Department

Institute of Land Management and Rural Development

Vietnam National University of Forestry

Xuan Mai town, Chuong My district, Hanoi city

Mobile phone: +84973250982

## **A. Introduction of research**

Vietnam has been recognized as one of the 16 countries with high biodiversity in the world and is one of the priority countries for global conservation, with about 10% species worldwide and area accounts for only 1% of the land area of the world (PARC, 2002). Natural protected areas system comprises 164 PAs, including 30 National Parks, 69 Nature Reserves, and 45 landscape protection areas, 20 areas of empirical scientific research (MARD, 2007). Thus, PAs protection and management are of vital significance for biodiversity conservation in Vietnam (Bruner et al. 2001). However, the loss of biodiversity in Vietnam has been very critical, with many species are on the brink of extinction due to human exploitation (Nghia 1999, and Primack et al. 1999).

Vietnam is one of the countries in the world to be considered as the highest proportion of threatened species (Pilgrim & Tu 2007). Vietnam has more than 300 species threaten data global level, including 49 species are considered in the case of many Endangered, Threatened, and Rare plant and animal species are at risk on the brink of extinction (World Bank, 2005). In order to identify threats influencing biodiversity conservation needs a conservation strategy based on situational analysis and a biological assessment to formulate the priority landscape (Baltzer 2000). The biodiversity assessment process was facing many limitations (Tordoff, 2003). One of the root limitations for the biodiversity assessment process in Vietnam is the incomprehensive data set on the conservation status of Vietnam's protected areas. The data of biodiversity is usually identified through personal observation, interviews, and the capacity of institutions responsible for protected areas management. Based on the previous information described before, it is necessary to carry out a study as follows "Application of Geoinformation Science (GIS) to establish a database of biodiversity conservation for regional planning and management of protected areas in the northern region of Vietnam."

***The figure of the criteria tree in biodiversity conservation:***

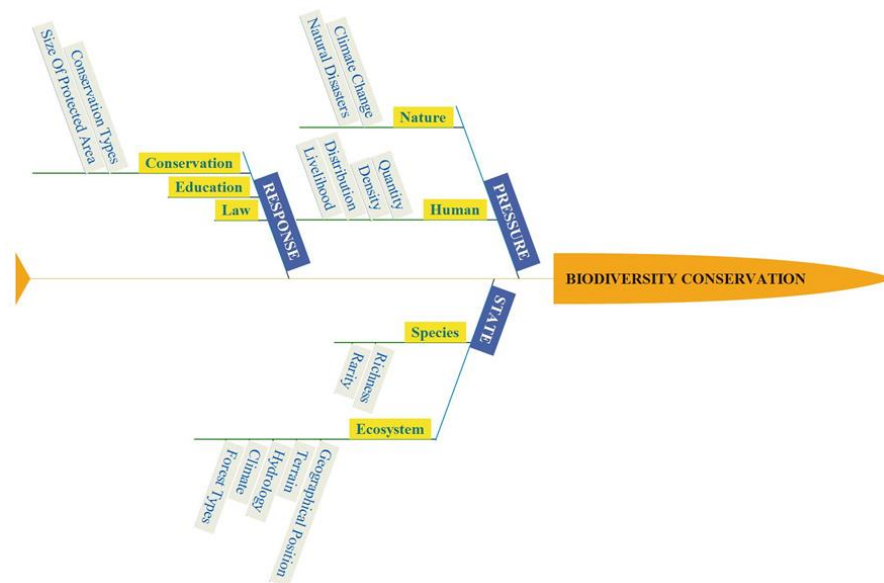

## B. Information of respondent

*Please provide the following general information about you. All personal information will be confidential*

**1. Full name: \***

.....

**1. Gender:**

Male ☐

Female ☐

**2. Age:**

.....

**3. Email:**

.....

**4. Phone number:**

.....

**5. Major field: \***

.....

**6. Position in organization\***

.....

**7. Address of organization: \***

*Please follow the order: House number, street number, commune, district, province*

.....

.....

.....

### C. Assessment of respondent

1. To assess the priority level in biodiversity conservation, we have three factors, including "State," "Pressure," and "Response." Which importance level do you think are the below factors influencing the priority areas of biodiversity conservation? \* Please give us your opinion about the level of importance for each criterion following nine levels from 1 (non-influence) to 9 (extreme influence)

|          | 1                     | 2                     | 3                     | 4                     | 5                     | 6                     | 7                     | 8                     | 9                     |
|----------|-----------------------|-----------------------|-----------------------|-----------------------|-----------------------|-----------------------|-----------------------|-----------------------|-----------------------|
| State    | <input type="radio"/> |
| Pressure | <input type="radio"/> |
| Response | <input type="radio"/> |

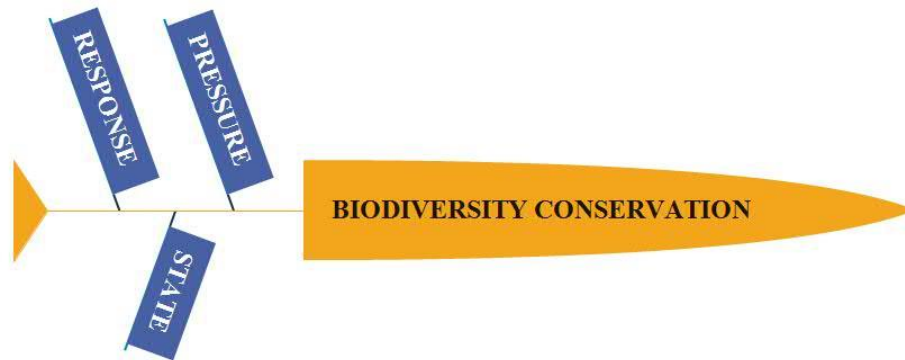

2. "State" factor includes two criteria are "species" and "ecosystem" state. Which importance level do you think is the below criteria influencing the "State" factor? \*Please give us your opinion about the level of importance for each criterion following nine levels from 1 (non-influence) to 9 (extreme influence)

|           | 1                     | 2                     | 3                     | 4                     | 5                     | 6                     | 7                     | 8                     | 9                     |
|-----------|-----------------------|-----------------------|-----------------------|-----------------------|-----------------------|-----------------------|-----------------------|-----------------------|-----------------------|
| Species   | <input type="radio"/> |
| Ecosystem | <input type="radio"/> |

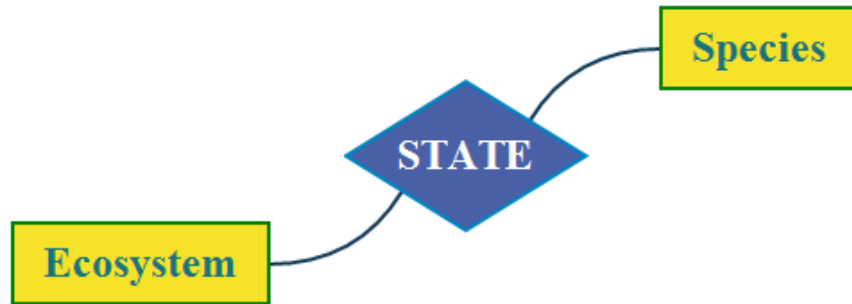

3. "Pressure" factor includes two criteria are "Nature" and "Human" pressure. Which importance level do you think is the below criteria influencing the "pressure" factor? \*Please give us your opinion about the level of importance for each criterion following nine levels from 1(non-influence) to 9 (extreme influence)

|        | 1                     | 2                     | 3                     | 4                     | 5                     | 6                     | 7                     | 8                     | 9                     |
|--------|-----------------------|-----------------------|-----------------------|-----------------------|-----------------------|-----------------------|-----------------------|-----------------------|-----------------------|
| Nature | <input type="radio"/> |
| Human  | <input type="radio"/> |

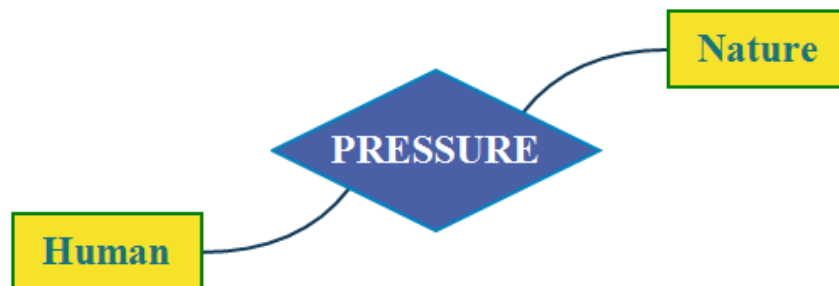

4. "Response" factor includes three criteria is "Conservation," "Education," and "Law." Which importance level do you think is the below criteria influencing the "response" factor? \*Please give us your opinion about the level of importance for each criterion following nine levels from 1(non-influence) to 9 (extreme influence)

|              | 1                     | 2                     | 3                     | 4                     | 5                     | 6                     | 7                     | 8                     | 9                     |
|--------------|-----------------------|-----------------------|-----------------------|-----------------------|-----------------------|-----------------------|-----------------------|-----------------------|-----------------------|
| Conservation | <input type="radio"/> |
| Education    | <input type="radio"/> |
| Law          | <input type="radio"/> |

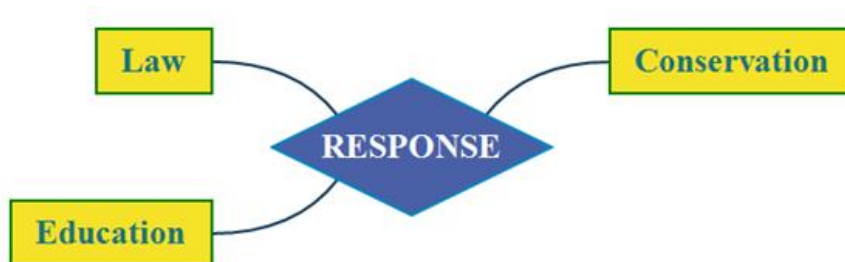

5. "Richness" and "Rarity" are two sub-criteria chosen for showing the "Species" state. Which importance level do you think is the below sub-criteria influencing the "species" criterion? *\*Please give us your opinion about the level of importance for each criterion following nine levels from 1(non-influence) to 9 (extreme influence)*

|          | 1                     | 2                     | 3                     | 4                     | 5                     | 6                     | 7                     | 8                     | 9                     |
|----------|-----------------------|-----------------------|-----------------------|-----------------------|-----------------------|-----------------------|-----------------------|-----------------------|-----------------------|
| Richness | <input type="radio"/> |
| Rarity   | <input type="radio"/> |

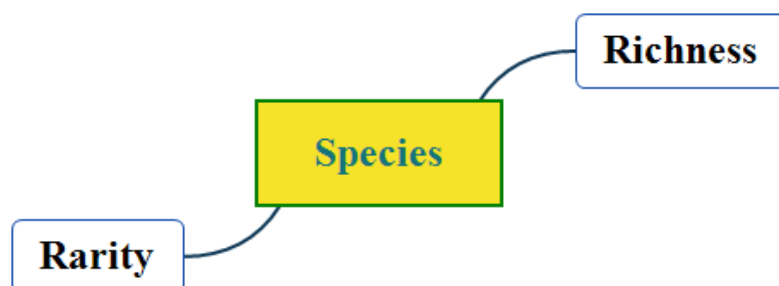

6.

"Location," "Forest types," "Climate," "Hydrology," and "Topography" are the sub-criteria that impact the selection of the "Ecosystem" condition for biodiversity conservation. Which importance level do you think is the below sub-criteria influencing the "ecosystem" criterion? *\*Please give us your opinion about the level of importance for each criterion following nine levels from 1 (non-influence) to 9 (extreme influence)*

|              | 1                     | 2                     | 3                     | 4                     | 5                     | 6                     | 7                     | 8                     | 9                     |
|--------------|-----------------------|-----------------------|-----------------------|-----------------------|-----------------------|-----------------------|-----------------------|-----------------------|-----------------------|
| Location     | <input type="radio"/> |
| Forest types | <input type="radio"/> |
| Climate      | <input type="radio"/> |
| Hydrology    | <input type="radio"/> |
| Topography   | <input type="radio"/> |

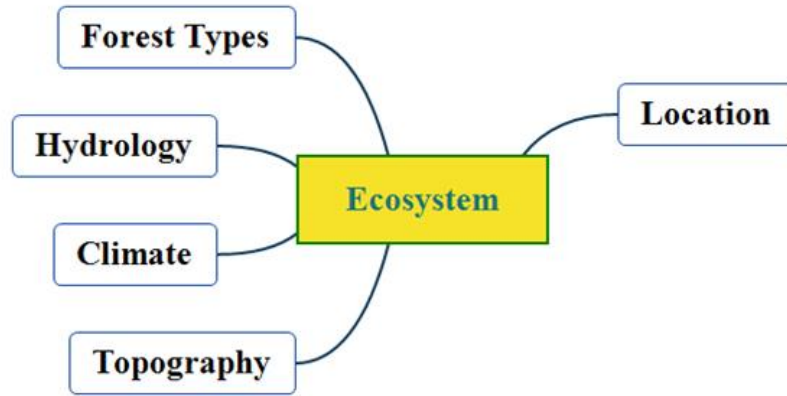

7. The pressure for biodiversity conservation caused "Nature" is built up by "Climate change" and "Natural disasters" sub-criteria. Which influence level of the sub-criteria is fit for "Nature" pressure? *\*Please give us your opinion about the level of importance for each criterion following nine levels from 1(non-influence) to 9 (extreme influence)*

|                  | 1                     | 2                     | 3                     | 4                     | 5                     | 6                     | 7                     | 8                     | 9                     |
|------------------|-----------------------|-----------------------|-----------------------|-----------------------|-----------------------|-----------------------|-----------------------|-----------------------|-----------------------|
| Climate change   | <input type="radio"/> |
| Natural disaster | <input type="radio"/> |

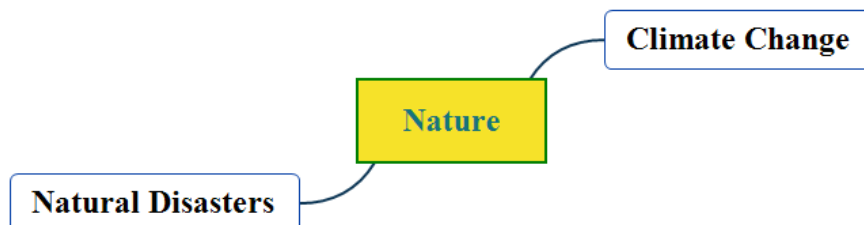

8. The pressure for biodiversity conservation caused "Human" is built up by "Distribution," "Density," "Population," and "Livelihood" sub-criteria. Which influence level of the sub-criteria is fit for "Human" pressure? *\*Please give us your opinion about the level of importance for each criterion following nine levels from 1(non-influence) to 9 (extreme influence)*

|              | 1                     | 2                     | 3                     | 4                     | 5                     | 6                     | 7                     | 8                     | 9                     |
|--------------|-----------------------|-----------------------|-----------------------|-----------------------|-----------------------|-----------------------|-----------------------|-----------------------|-----------------------|
| Distribution | <input type="radio"/> |
| Density      | <input type="radio"/> |
| Population   | <input type="radio"/> |
| Livelihood   | <input type="radio"/> |

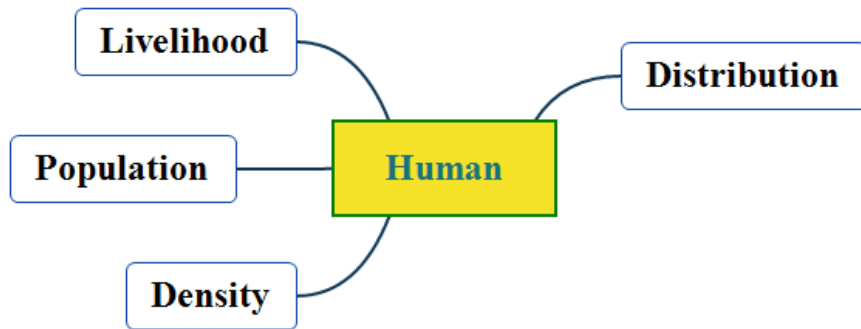

9. "Forest management types" and "Size of forest area" are two sub-criteria that create a protected area. Which importance level do you think is the below sub-criteria influencing the "Conservation" response? *\*Please give us your opinion about the level of importance for each criterion following nine levels from 1 (non-influence) to 9 (extreme influence)*

|                         | 1                     | 2                     | 3                     | 4                     | 5                     | 6                     | 7                     | 8                     | 9                     |
|-------------------------|-----------------------|-----------------------|-----------------------|-----------------------|-----------------------|-----------------------|-----------------------|-----------------------|-----------------------|
| Forest management types | <input type="radio"/> |
| Size of forest area     | <input type="radio"/> |

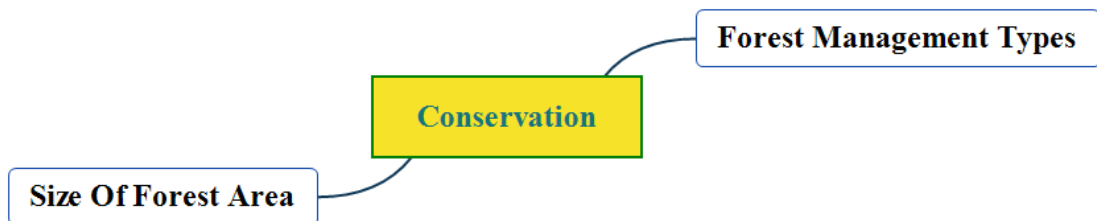

10. In your opinion, within biodiversity conservation, which other criteria are significant, and which influence levels do you choose for them?

*If you have any opinion for this question, please give us your assessment for the following nine levels from 1 (non-influence) to 9 (extreme influence)*

.....

.....

.....

.....

.....

## **D. Acknowledgement**

My sincere thanks go to all the respondents of the survey, who supported me with your valuable opinion and knowledge of biodiversity conservation.

I promise that all personal information will be kept confidential.

Sincerely,

Vu Xuan Dinh

---

## ***Appendix S2: List of interviewees***

| No                                    | Sex    | Age | Background                    | Organization                        |
|---------------------------------------|--------|-----|-------------------------------|-------------------------------------|
| <b>I. Protected areas group (PAs)</b> |        |     |                               |                                     |
| 1                                     | Male   | 50  | Silviculture                  | Cat Tien National Park              |
| 2                                     | Male   | 50  | Forestry ecology              | Cat Tien National Park              |
| 3                                     | Female | 30  | Environmental science         | Cuc Phuong National Park            |
| 4                                     | Male   | 35  | Forest protection             | Cuc Phuong National Park            |
| 5                                     | Male   | 46  | Forest protection             | Cuc Phuong National Park            |
| 6                                     | Male   | 41  | Silviculture                  | Cuc Phuong National Park            |
| 7                                     | Male   | 46  | Forestry                      | Cuc Phuong National Park            |
| 8                                     | Male   | 54  | Silviculture                  | Cuc Phuong National Park            |
| 9                                     | Male   | 45  | Forestry                      | Cuc Phuong National Park            |
| 10                                    | Male   | 32  | Forestry                      | Cuc Phuong National Park            |
| 11                                    | Male   | 52  | Forestry                      | Cuc Phuong National Park            |
| 12                                    | Male   | 38  | Forest protection             | Cuc Phuong National Park            |
| 13                                    | Male   | 36  | Forestry                      | Cuc Phuong National Park            |
| 14                                    | Female | 39  | Forestry                      | Cuc Phuong National Park            |
| 15                                    | Female | 33  | Forestry                      | Cuc Phuong National Park            |
| 16                                    | Female | 37  | Ecology travel                | Cuc Phuong National Park            |
| 17                                    | Female | 27  | Ecotourism                    | Cuc Phuong National Park            |
| 18                                    | Male   | 28  | Communication of conservation | Cuc Phuong National Park            |
| 19                                    | Female | 24  | Forest protection             | Cuc Phuong National Park            |
| 20                                    | Male   | 32  | Silviculture                  | Cuc Phuong National Park            |
| 21                                    | Male   | 37  | Forestry                      | Cuc Phuong National Park            |
| 22                                    | Male   | 41  | Forestry                      | Cuc Phuong National Park            |
| 23                                    | Male   | 38  | Forestry                      | Hoang Lien National Park            |
| 24                                    | Male   | 31  | Forestry                      | Hoang Lien National Park            |
| 25                                    | Male   | 38  | Forest protection             | Muong La Nature Reserve             |
| 26                                    | Male   | 43  | Silviculture                  | Ngoc Son - Ngo Luong Nature Reserve |
| 27                                    | Male   | 41  | Silviculture                  | Ngoc Son - Ngo Luong Nature Reserve |

|    |        |    |                           |                                     |
|----|--------|----|---------------------------|-------------------------------------|
| 28 | Male   | 52 | Forestry                  | Ngoc Son - Ngo Luong Nature Reserve |
| 29 | Male   | 35 | Forest protection         | Ngoc Son - Ngo Luong Nature Reserve |
| 30 | Male   | 34 | Forest protection         | Ngoc Son - Ngo Luong Nature Reserve |
| 31 | Male   | 30 | Forest protection         | Ngoc Son - Ngo Luong Nature Reserve |
| 32 | Male   | 47 | Silviculture              | Ngoc Son - Ngo Luong Nature Reserve |
| 33 | Male   | 53 | Hunter                    | Ngoc Son - Ngo Luong Nature Reserve |
| 34 | Male   | 41 | Forestry                  | Ngoc Son - Ngo Luong Nature Reserve |
| 35 | Male   | 45 | Forestry                  | Ngoc Son - Ngo Luong Nature Reserve |
| 36 | Male   | 38 | Forestry                  | Pu Hu Protected Area                |
| 37 | Male   | 38 | Forestry                  | Pu Hu Protected Area                |
| 38 | Male   | 32 | Biodiversity conservation | Pu Hu Protected Area                |
| 39 | Female | 23 | Agriculture               | Pu Luong Nature Reserve             |
| 40 | Male   | 45 | Forestry                  | Pu Luong Nature Reserve             |
| 41 | Male   | 34 | Forest protection         | Pu Luong Nature Reserve             |
| 42 | Male   | 34 | Forestry                  | Pu Luong Nature Reserve             |
| 43 | Male   | 33 | Forest protection         | Pu Luong Nature Reserve             |
| 44 | Male   | 34 | Biodiversity conservation | Pu Luong Nature Reserve             |
| 45 | Female | 28 | Silviculture              | Pu Luong Nature Reserve             |
| 46 | Male   | 28 | Biodiversity conservation | Pu Luong Nature Reserve             |
| 47 | Male   | 34 | Forestry                  | Pu Luong Nature Reserve             |
| 48 | Male   | 35 | Forestry                  | Pu Luong Nature Reserve             |
| 49 | Male   | 55 | Forestry                  | Pu Luong Nature Reserve             |
| 50 | Female | 33 | Silviculture              | Pu Luong Nature Reserve             |
| 51 | Male   | 37 | Forestry                  | Pu Luong Nature Reserve             |
| 52 | Male   | 43 | Forestry                  | Pu Luong Nature Reserve             |
| 53 | Male   | 28 | Forestry                  | Pu Luong Nature Reserve             |
| 54 | Male   | 52 | Forestry                  | Pu Luong Nature Reserve             |
| 55 | Male   | 45 | Law                       | Pu Luong Nature Reserve             |
| 56 | Male   | 53 | Forestry                  | Pu Luong Nature Reserve             |
| 57 | Male   | 37 | Forestry                  | Pu Mat National Park                |
| 58 | Male   | 31 | Silviculture              | Pu Mat National Park                |

|                                                              |        |    |                           |                                                                       |
|--------------------------------------------------------------|--------|----|---------------------------|-----------------------------------------------------------------------|
| 59                                                           | Male   | 30 | Forestry                  | Song Thanh Nature Reserve                                             |
| 60                                                           | Male   | 38 | Forestry                  | Tam Dao National Park                                                 |
| 61                                                           | Female | 44 | Forestry                  | Van Long Nature Reserve                                               |
| 62                                                           | Male   | 37 | Silviculture              | Van Long Nature Reserve                                               |
| 63                                                           | Male   | 37 | Forestry                  | Van Long Nature Reserve                                               |
| 64                                                           | Female | 36 | Forestry                  | Van Long Nature Reserve                                               |
| <b>II. Universities and Research Institutes Group (URIs)</b> |        |    |                           |                                                                       |
| 65                                                           | Male   | 29 | Land management           | Can Tho University                                                    |
| 66                                                           | Female | 22 | Silviculture              | Can Tho University                                                    |
| 67                                                           | Male   | 70 | Biodiversity conservation | Hanoi National University                                             |
| 68                                                           | Male   | 43 | Agriculture               | Hanoi University of Agriculture                                       |
| 69                                                           | Male   | 27 | Geophysics                | Hanoi University of Mining and Geology                                |
| 70                                                           | Male   | 25 | Land management           | Hue University of Agriculture and Forestry                            |
| 71                                                           | Male   | 28 | Environmental science     | Vietnam Institute of forest inventory and planning                    |
| 72                                                           | Male   | 32 | Forestry                  | Vietnam Institute of forest inventory and planning                    |
| 73                                                           | Male   | 34 | Forestry                  | Vietnam Institute of forest science                                   |
| 74                                                           | Male   | 38 | Hydrology                 | Vietnam Institute of geography                                        |
| 75                                                           | Male   | 63 | Remote sensing            | Vietnam Institute of geography                                        |
| 76                                                           | Male   | 42 | GIS and remote sensing    | Vietnam Institute of geography                                        |
| 77                                                           | Female | 41 | Forestry                  | Vietnam Institute of Management for Agriculture and Rural Development |
| 78                                                           | Female | 44 | Forestry                  | Vietnam Institute of Management for Agriculture and Rural Development |
| 79                                                           | Male   | 34 | Geodesy                   | Vietnam Institute of natural resource inventory and planning          |
| 80                                                           | Male   | 37 | Forestry ecology          | Vietnam national university of forestry                               |
| 81                                                           | Male   | 38 | Forestry inventory        | Vietnam national university of forestry                               |
| 82                                                           | Male   | 37 | Forestry inventory        | Vietnam national university of forestry                               |
| 83                                                           | Female | 34 | Silviculture              | Vietnam national university of forestry                               |
| 84                                                           | Female | 34 | Silviculture              | Vietnam national university of forestry                               |
| 85                                                           | Male   | 38 | Forestry ecology          | Vietnam national university of forestry                               |
| 86                                                           | Male   | 36 | Forestry inventory        | Vietnam national university of forestry                               |

|     |        |    |              |                                         |
|-----|--------|----|--------------|-----------------------------------------|
| 87  | Male   | 42 | Silviculture | Vietnam national university of forestry |
| 88  | Male   | 21 | Silviculture | Vietnam national university of forestry |
| 89  | Female | 21 | Silviculture | Vietnam national university of forestry |
| 90  | Female | 20 | Silviculture | Vietnam national university of forestry |
| 91  | Female | 21 | Silviculture | Vietnam national university of forestry |
| 92  | Female | 21 | Silviculture | Vietnam national university of forestry |
| 93  | Female | 21 | Silviculture | Vietnam national university of forestry |
| 94  | Female | 21 | Silviculture | Vietnam national university of forestry |
| 95  | Female | 21 | Silviculture | Vietnam national university of forestry |
| 96  | Female | 21 | Silviculture | Vietnam national university of forestry |
| 97  | Female | 23 | Silviculture | Vietnam national university of forestry |
| 98  | Female | 22 | Silviculture | Vietnam national university of forestry |
| 99  | Female | 22 | Silviculture | Vietnam national university of forestry |
| 100 | Female | 22 | Silviculture | Vietnam national university of forestry |
| 101 | Female | 22 | Silviculture | Vietnam national university of forestry |
| 102 | Male   | 23 | Silviculture | Vietnam national university of forestry |
| 103 | Female | 21 | Silviculture | Vietnam national university of forestry |
| 104 | Female | 20 | Silviculture | Vietnam national university of forestry |
| 105 | Female | 22 | Silviculture | Vietnam national university of forestry |
| 106 | Female | 22 | Silviculture | Vietnam national university of forestry |
| 107 | Female | 21 | Silviculture | Vietnam national university of forestry |
| 108 | Female | 21 | Silviculture | Vietnam national university of forestry |
| 109 | Female | 21 | Silviculture | Vietnam national university of forestry |
| 110 | Female | 22 | Silviculture | Vietnam national university of forestry |
| 111 | Female | 22 | Silviculture | Vietnam national university of forestry |
| 112 | Female | 21 | Silviculture | Vietnam national university of forestry |
| 113 | Male   | 22 | Forestry     | Vietnam national university of forestry |
| 114 | Male   | 22 | Forestry     | Vietnam national university of forestry |
| 115 | Male   | 21 | Forestry     | Vietnam national university of forestry |
| 116 | Male   | 22 | Forestry     | Vietnam national university of forestry |
| 117 | Male   | 24 | Forestry     | Vietnam national university of forestry |

|     |        |    |                           |                                         |
|-----|--------|----|---------------------------|-----------------------------------------|
| 118 | Male   | 21 | Forestry                  | Vietnam national university of forestry |
| 119 | Male   | 21 | Forestry                  | Vietnam national university of forestry |
| 120 | Male   | 21 | Forestry                  | Vietnam national university of forestry |
| 121 | Male   | 21 | Forestry                  | Vietnam national university of forestry |
| 122 | Male   | 21 | Forestry                  | Vietnam national university of forestry |
| 123 | Male   | 21 | Forestry                  | Vietnam national university of forestry |
| 124 | Female | 21 | Forestry                  | Vietnam national university of forestry |
| 125 | Female | 21 | Forestry                  | Vietnam national university of forestry |
| 126 | Male   | 21 | Forestry                  | Vietnam national university of forestry |
| 127 | Male   | 21 | Forestry                  | Vietnam national university of forestry |
| 128 | Male   | 22 | Forestry                  | Vietnam national university of forestry |
| 129 | Male   | 22 | Forestry                  | Vietnam national university of forestry |
| 130 | Male   | 21 | Forestry                  | Vietnam national university of forestry |
| 131 | Female | 21 | Forestry                  | Vietnam national university of forestry |
| 132 | Female | 21 | Forestry                  | Vietnam national university of forestry |
| 133 | Female | 21 | Forestry                  | Vietnam national university of forestry |
| 134 | Female | 21 | Forestry                  | Vietnam national university of forestry |
| 135 | Female | 21 | Forestry                  | Vietnam national university of forestry |
| 136 | Female | 22 | Forestry                  | Vietnam national university of forestry |
| 137 | Female | 21 | Forestry                  | Vietnam national university of forestry |
| 138 | Female | 22 | Forestry                  | Vietnam national university of forestry |
| 139 | Female | 21 | Forestry                  | Vietnam national university of forestry |
| 140 | Male   | 21 | Forestry                  | Vietnam national university of forestry |
| 141 | Female | 21 | Forestry                  | Vietnam national university of forestry |
| 142 | Female | 21 | Forestry                  | Vietnam national university of forestry |
| 143 | Male   | 23 | Forestry                  | Vietnam national university of forestry |
| 144 | Female | 21 | Forestry                  | Vietnam national university of forestry |
| 145 | Male   | 37 | Biodiversity conservation | Vietnam national university of forestry |
| 146 | Female | 39 | Forestry                  | Vietnam national university of forestry |
| 147 | Male   | 50 | Forest protection         | Vietnam national university of forestry |
| 148 | Male   | 34 | Silviculture              | Vietnam national university of forestry |

|                                                  |        |    |                       |                                                            |
|--------------------------------------------------|--------|----|-----------------------|------------------------------------------------------------|
| 149                                              | Male   | 44 | Silviculture          | Vietnam national university of forestry                    |
| 150                                              | Male   | 48 | Botany                | Vietnam national university of forestry                    |
| 151                                              | Male   | 43 | Forestry inventory    | Vietnam national university of forestry                    |
| 152                                              | Male   | 49 | Forestry              | Vietnam national university of forestry                    |
| <b>III. Government Organizations Group (GOs)</b> |        |    |                       |                                                            |
| 153                                              | Male   | 47 | Forestry              | Bac Giang Department of Agriculture and Rural Development  |
| 154                                              | Male   | 26 | Land management       | Dong Nai Department of Environment and Natural Resources   |
| 155                                              | Male   | 27 | Environmental science | Environment and Natural Resources Department               |
| 156                                              | Male   | 34 | Environmental science | Environment and Natural Resources Department               |
| 157                                              | Male   | 45 | Soil science          | Environmental Center                                       |
| 158                                              | Male   | 25 | Forestry              | Forest Protection Department                               |
| 159                                              | Male   | 35 | Forest protection     | Forest Protection Department                               |
| 160                                              | Male   | 45 | Forestry              | Forest Protection Department                               |
| 161                                              | Male   | 37 | Forest protection     | Forest Protection Department                               |
| 162                                              | Female | 40 | Silviculture          | Forest Protection Department                               |
| 163                                              | Male   | 28 | Forestry              | Forest Protection Department                               |
| 164                                              | Male   | 35 | Forestry              | Forest Protection Department                               |
| 165                                              | Male   | 38 | Forestry              | Forest Protection Station                                  |
| 166                                              | Male   | 28 | Forest protection     | Forest Protection Station                                  |
| 167                                              | Male   | 40 | Forest protection     | Forest Protection Station                                  |
| 168                                              | Male   | 32 | Forestry              | Forest Protection Station                                  |
| 169                                              | Male   | 35 | Forest protection     | Forest Protection Station                                  |
| 170                                              | Male   | 33 | Forestry inventory    | Forest Protection Station                                  |
| 171                                              | Male   | 38 | Forest protection     | Forest Protection Station                                  |
| 172                                              | Male   | 47 | Forestry              | Ha Giang Department of Agriculture and Rural Development   |
| 173                                              | Female | 23 | Land management       | Land Management Center                                     |
| 174                                              | Male   | 30 | Forestry inventory    | Tuyen Quang Center of Agroforestry Management and Planning |
| 175                                              | Male   | 48 | Environmental science | Vietnam Center for Monitoring and Technical Resources      |

|                   |        |    |                       |                                                       |
|-------------------|--------|----|-----------------------|-------------------------------------------------------|
| 176               | Male   | 25 | Environmental geology | Vietnam Center for Monitoring and Technical Resources |
| <b>IV. Others</b> |        |    |                       |                                                       |
| 177               | Male   | 40 | Geology               | Ha An Company                                         |
| 178               | Female | 28 | Forestry              | ICRAF Vietnam                                         |
| 179               | Male   | 30 | Forestry economy      | ICRAF Vietnam                                         |
| 180               | Male   | 23 | Agriculture           | ICRAF Vietnam                                         |
| 181               | Female | 28 | Resource management   | ICRAF Vietnam                                         |
| 182               | Male   | 34 | Silviculture          | Kim Hoang Company                                     |
| 183               | Male   | 27 | Forestry              | Kim Hoang Company                                     |
| 184               | Male   | 27 | Land management       | Loc Ninh Company                                      |
| 185               | Male   | 28 | Geology               | Thuan Phat Company                                    |

*Appendix S3: Synthesizing the numbers of respondents in pairwise*

| Category     |           | A              | A>B |   |   |   |   |    |    |    |    | A=B | A<B |     |     |     |     |     |     |     |     | B               |
|--------------|-----------|----------------|-----|---|---|---|---|----|----|----|----|-----|-----|-----|-----|-----|-----|-----|-----|-----|-----|-----------------|
|              |           |                | Sum | 9 | 8 | 7 | 6 | 5  | 4  | 3  | 2  |     | 1/2 | 1/3 | 1/4 | 1/5 | 1/6 | 1/7 | 1/8 | 1/9 | Sum |                 |
| Factors      | State     | State          | 59  | 0 | 0 | 2 | 1 | 11 | 5  | 13 | 27 | 54  | 44  | 12  | 10  | 4   | 0   | 0   | 0   | 0   | 70  | Pressure        |
|              | State     | State          | 58  | 0 | 0 | 2 | 2 | 9  | 9  | 19 | 17 | 71  | 22  | 13  | 11  | 7   | 1   | 0   | 0   | 0   | 54  | Response        |
|              | Pressure  | Pressure       | 61  | 0 | 0 | 1 | 3 | 8  | 9  | 15 | 25 | 58  | 33  | 15  | 5   | 10  | 0   | 1   | 0   | 0   | 64  | Response        |
| Criteria     | State     | Species        | 48  | 1 | 0 | 0 | 1 | 2  | 3  | 5  | 36 | 70  | 40  | 20  | 4   | 1   | 0   | 0   | 0   | 0   | 65  | Ecosystem       |
|              | Pressure  | Nature         | 13  | 0 | 0 | 0 | 0 | 1  | 0  | 3  | 9  | 18  | 40  | 26  | 35  | 24  | 10  | 11  | 4   | 2   | 152 | Human           |
|              | Response  | Conservation   | 44  | 0 | 0 | 0 | 0 | 1  | 3  | 8  | 32 | 68  | 45  | 14  | 9   | 3   | 0   | 0   | 0   | 0   | 71  | Education       |
|              |           | Conservation   | 38  | 0 | 0 | 0 | 1 | 4  | 7  | 8  | 18 | 80  | 44  | 9   | 7   | 5   | 0   | 0   | 0   | 0   | 65  | Law             |
|              |           | Education      | 53  | 0 | 0 | 2 | 0 | 2  | 4  | 14 | 31 | 87  | 25  | 14  | 2   | 2   | 0   | 0   | 0   | 0   | 43  | Law             |
|              | Species   | Richness       | 52  | 0 | 0 | 0 | 0 | 2  | 3  | 22 | 25 | 58  | 41  | 23  | 5   | 3   | 1   | 0   | 0   | 0   | 73  | Rarity          |
| Sub-criteria | Ecosystem | Location       | 54  | 0 | 0 | 0 | 1 | 4  | 3  | 16 | 30 | 59  | 44  | 19  | 4   | 1   | 0   | 0   | 2   | 0   | 70  | Topography      |
|              |           | Location       | 80  | 0 | 0 | 0 | 5 | 4  | 5  | 24 | 42 | 56  | 35  | 6   | 3   | 1   | 0   | 1   | 0   | 1   | 47  | Hydrology       |
|              |           | Location       | 56  | 0 | 0 | 0 | 2 | 1  | 4  | 19 | 30 | 56  | 41  | 18  | 6   | 4   | 1   | 0   | 0   | 1   | 71  | Climate         |
|              |           | Location       | 51  | 0 | 0 | 0 | 0 | 2  | 6  | 8  | 35 | 46  | 45  | 26  | 11  | 2   | 1   | 0   | 0   | 1   | 86  | Forest type     |
|              |           | Topography     | 80  | 0 | 0 | 0 | 0 | 1  | 14 | 23 | 42 | 73  | 23  | 4   | 1   | 2   | 0   | 0   | 0   | 0   | 30  | Hydrology       |
|              |           | Topography     | 65  | 0 | 0 | 0 | 0 | 1  | 3  | 22 | 39 | 56  | 37  | 15  | 3   | 5   | 2   | 0   | 0   | 0   | 62  | Climate         |
|              |           | Topography     | 48  | 0 | 1 | 0 | 0 | 1  | 4  | 8  | 34 | 56  | 49  | 17  | 8   | 5   | 0   | 0   | 0   | 0   | 79  | Forest type     |
|              |           | Hydrology      | 21  | 0 | 0 | 0 | 0 | 0  | 1  | 4  | 16 | 84  | 41  | 26  | 8   | 3   | 0   | 0   | 0   | 0   | 78  | Climate         |
|              |           | Hydrology      | 28  | 0 | 0 | 1 | 0 | 0  | 1  | 7  | 19 | 57  | 42  | 36  | 8   | 10  | 2   | 0   | 0   | 0   | 98  | Forest type     |
|              |           | Climate        | 60  | 0 | 0 | 0 | 1 | 1  | 2  | 11 | 45 | 50  | 37  | 24  | 7   | 5   | 0   | 0   | 0   | 0   | 73  | Forest type     |
|              | Nature    | Climate change | 100 | 0 | 1 | 3 | 5 | 4  | 16 | 33 | 38 | 58  | 14  | 7   | 1   | 3   | 0   | 0   | 0   | 0   | 25  | Nature disaster |
|              | Human     | Distribution   | 50  | 0 | 0 | 1 | 0 | 1  | 8  | 13 | 27 | 75  | 46  | 11  | 1   | 0   | 0   | 0   | 0   | 0   | 58  | Density         |
|              |           | Distribution   | 47  | 0 | 0 | 1 | 0 | 2  | 5  | 17 | 22 | 68  | 44  | 17  | 7   | 0   | 0   | 0   | 0   | 0   | 68  | Quantity        |
|              |           | Distribution   | 19  | 0 | 0 | 0 | 0 | 1  | 4  | 2  | 12 | 59  | 40  | 33  | 21  | 8   | 2   | 1   | 0   | 0   | 105 | Livelihood      |
|              |           | Density        | 30  | 0 | 0 | 0 | 0 | 0  | 0  | 6  | 24 | 107 | 33  | 9   | 2   | 1   | 1   | 0   | 0   | 0   | 46  | Quantity        |
|              |           | Density        | 21  | 0 | 0 | 0 | 0 | 0  | 0  | 4  | 17 | 45  | 53  | 36  | 15  | 10  | 2   | 1   | 0   | 0   | 117 | Livelihood      |
|              |           | Quantity       | 21  | 0 | 0 | 0 | 0 | 0  | 0  | 4  | 17 | 45  | 53  | 36  | 15  | 10  | 2   | 1   | 0   | 0   | 117 | Livelihood      |

|  |              |                      |    |   |   |   |   |   |   |    |    |    |    |    |   |   |   |   |   |   |    |             |
|--|--------------|----------------------|----|---|---|---|---|---|---|----|----|----|----|----|---|---|---|---|---|---|----|-------------|
|  | Conservation | Conservation<br>type | 75 | 0 | 0 | 1 | 0 | 4 | 9 | 27 | 34 | 55 | 34 | 14 | 3 | 0 | 1 | 1 | 0 | 0 | 53 | Size of PAs |
|--|--------------|----------------------|----|---|---|---|---|---|---|----|----|----|----|----|---|---|---|---|---|---|----|-------------|
